# Supplementary material for: Pb3[C6(CH3)3(CO2)3H6]2[DMF]3: first layered Pb-Kemp's triacid complex
Source: Royal Society of Chemistry journal article supplement (doi:10.1039/c5cc05360a), 2015-01-01

## Electronic Supplementary Information (ESI) for

### **Pb<sub>3</sub>[C<sub>6</sub>(CH<sub>3</sub>)<sub>3</sub>(CO<sub>2</sub>)<sub>3</sub>H<sub>6</sub>]<sub>2</sub>[DMF]<sub>3</sub>: First layered Pb-Kemp's triacid complex**

Saet Byeol Kim, Dong Woo Lee, Suk-Kyu Chang and Kang Min Ok\*

*Department of Chemistry, Chung-Ang University, 84 Heukseok-ro, Dongjak-gu, Seoul 156-756, Korea*

#### **CONTENTS**

- S1. Calculated and observed powder X-ray diffraction patterns for CAUMOF-17
- S2. Infrared spectrum of CAUMOF-17
- S3. Thermogravimetric analysis diagram and powder X-ray diffraction patterns at different temperatures of CAUMOF-17
- S4. Energy dispersive analysis by X-ray (EDX) data and powder X-ray diffraction pattern for the product of competing crystallization reaction between Cd<sup>2+</sup> and Pb<sup>2+</sup> with Kemp's triacid

S1. Calculated and observed powder X-ray diffraction patterns for CAUMOF-17

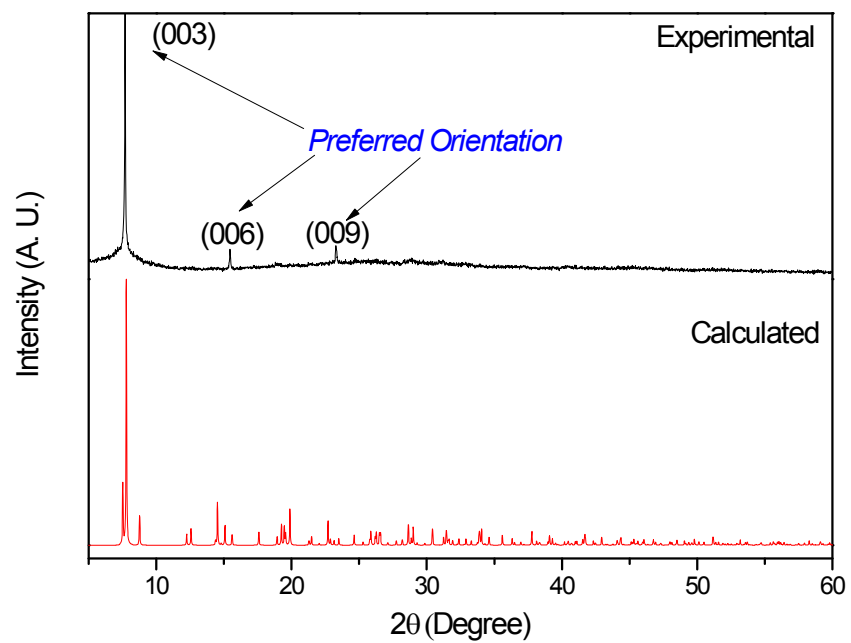

S2. Infrared spectrum of CAUMOF-17

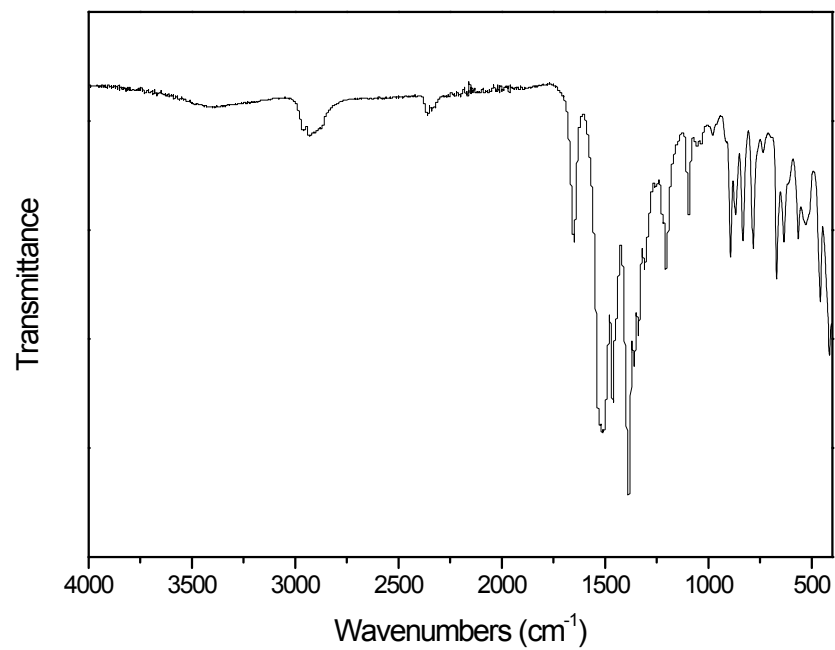

S3. Thermogravimetric analysis diagram and powder X-ray diffraction patterns at different temperatures of CAUMOF-17

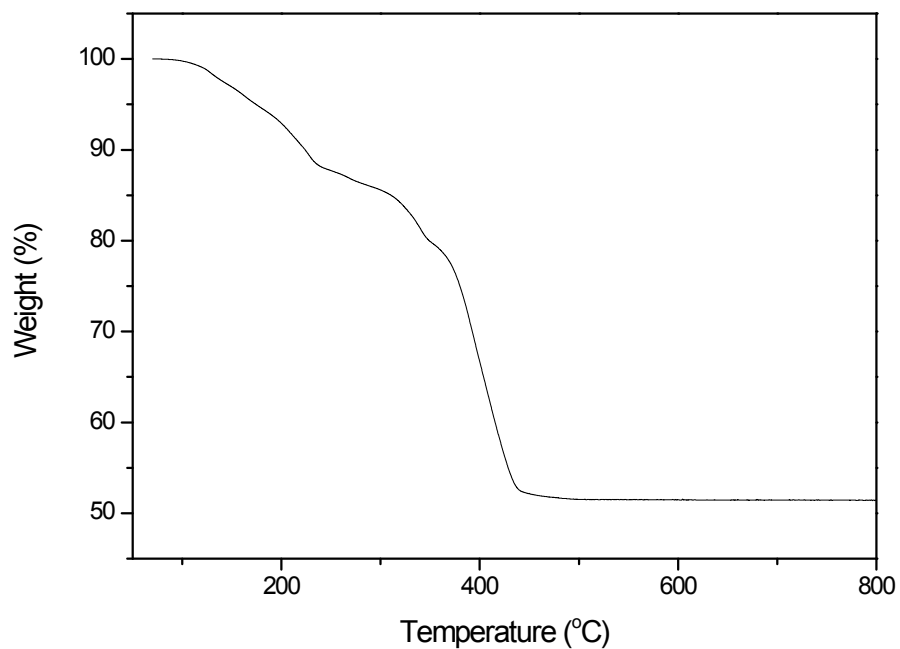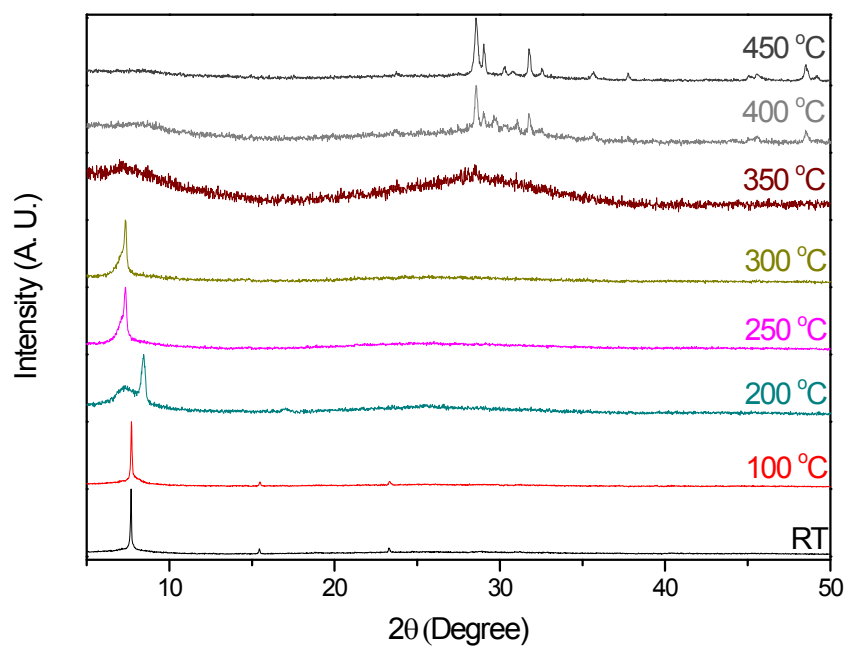

S4. Energy dispersive analysis by X-ray (EDX) data and powder X-ray diffraction pattern for the product of competing crystallization reaction between  $\text{Cd}^{2+}$  and  $\text{Pb}^{2+}$  with Kemp's triacid

| Element | Weight% | Atomic% |
|---------|---------|---------|
| C K     | 15.74   | 53.61   |
| N K     | 0.00    | 0.00    |
| O K     | 8.56    | 21.88   |
| Cd L    | 57.43   | 20.90   |
| Pb M    | 18.27   | 3.61    |
| Totals  | 100.00  |         |

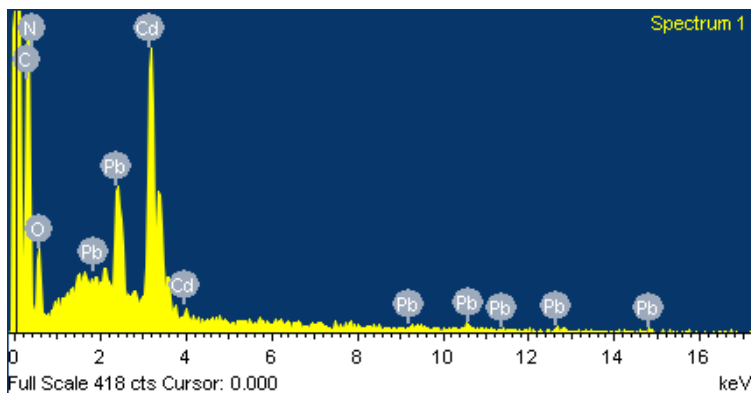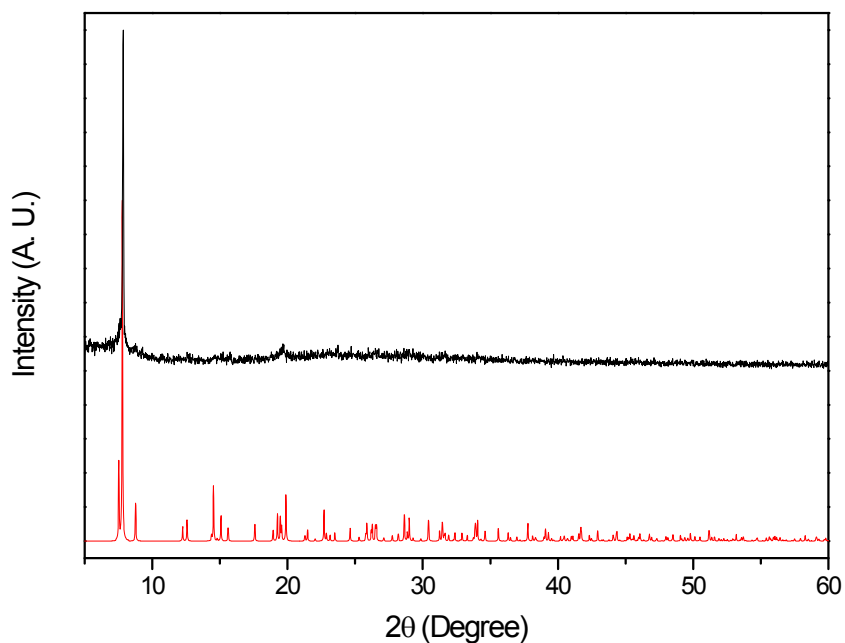

Supplement: c5cc05360a1.pdf [file c5cc05360a1.pdf]
